# Supplementary material for: The gamma chain subunit of Fc receptors is required for alpha-synuclein-induced pro-inflammatory signaling in microglia
Source: PubMed Central journal article supplement (PMC3526448; doi:10.1186/1742-2094-9-259), 2012-11-27

# Supplemental 1.

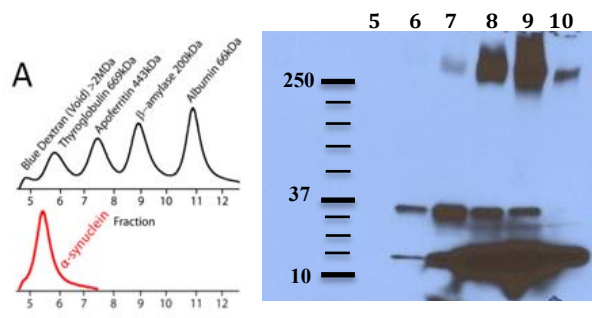

Supplement: 1742-2094-9-259-S1.pdf [file 1742-2094-9-259-S1.pdf]
